# Supplementary material for: Biocontrol of Rice Seedling Rot Disease Caused by Curvularia lunata and Helminthosporium oryzae by Epiphytic Yeasts from Plant Leaves
Source: PubMed Central journal article supplement (PMC7285343; doi:10.3390/microorganisms8050647), 2020-04-29
Supplement: microorganisms-08-00647-s001.pdf [file microorganisms-08-00647-s001.pdf]

**Table S1.** Yeast species and strains belonging to the phylum Ascomycota and Basidiomycota used in this study

| Taxa                                                   | Strain                                                                                                                                               | No. of strain |
|--------------------------------------------------------|------------------------------------------------------------------------------------------------------------------------------------------------------|---------------|
| <b>Phylum Ascomycota, Subphylum Saccharomycotina</b>   |                                                                                                                                                      |               |
| <i>Blastobotrys</i> sp.                                | YE-8                                                                                                                                                 | 1             |
| <i>Candida fermentati</i>                              | DMKU-CP175, DMKU-CP265, DMKU-CP373,<br>DMKU-CP79, DMKU-CP367                                                                                         | 5             |
| <i>Candida floricola</i>                               | DMKU-CP149, DMKU-CP367                                                                                                                               | 2             |
| <i>Candida fukuyamaensis</i>                           | DMKU-CP312                                                                                                                                           | 1             |
| <i>Candida intermedia</i>                              | DMKU-CP07, DMKU-CP03, DMKU-CP377,<br>DMKU-CP57, DMKU-CP59, YE-20                                                                                     | 6             |
| <i>Candida michaelii</i>                               | YE-239                                                                                                                                               | 1             |
| <i>Candida nivariensis</i>                             | DMKU-CP497                                                                                                                                           | 1             |
| <i>Candida parapsilosis</i>                            | DMKU-RP300                                                                                                                                           | 1             |
| <i>Candida pseudointermedia</i>                        | DMKU-CP501                                                                                                                                           | 1             |
| <i>Candida tropicalis</i>                              | YE-111, YE-115                                                                                                                                       | 2             |
| <i>Candida wangnamhkiaoensis</i>                       | YE-166                                                                                                                                               | 1             |
| <i>Hanseniaspora guilliermondii</i>                    | DMKU-CP295                                                                                                                                           | 1             |
| <i>Hanseniaspora opuntiae</i>                          | DMKU-CP99                                                                                                                                            | 1             |
| <i>Hyphopichia burtonii</i>                            | YE-164                                                                                                                                               | 1             |
| <i>Kodamaea ohmeri</i>                                 | DMKU-CP258, DMKU-CP281, DMKU-CP471,<br>DMKU-CP51                                                                                                     | 4             |
| <i>Meyerozyma caribbica</i>                            | DMKU-CP140, DMKU-CP160, DMKU-CP43,<br>DMKU-CP48, DMKU-CP503, DMKU-CP202,<br>DMKU-CP216, YE-184, YE-201, YE-238, YE-240                               | 11            |
| <i>Meyerozyma guilliermondii</i>                       | YE-100                                                                                                                                               | 1             |
| <i>Pichia myanmerensis</i>                             | YE-165                                                                                                                                               | 1             |
| <i>Wickerhamomyces anomalus</i>                        | DMKU-CP122, DMKU-CP127, YE-42                                                                                                                        | 4             |
| <b>Phylum Basidiomycota, Subphylum Agaricomycotina</b> |                                                                                                                                                      |               |
| <i>Goffeauzyma iberica</i>                             | DMKU-CP72                                                                                                                                            | 1             |
| <i>Kwoniella dendrophila</i>                           | DMKU-CP263                                                                                                                                           | 1             |
| <i>Kwoniella haveanensis</i>                           | DMKU-CP60, DMKU-CP96, DMKU-CP222                                                                                                                     | 3             |
| <i>Hannaell coprosmaensis</i>                          | DMKU-CP350                                                                                                                                           | 1             |
| <i>Hannella luteola</i>                                | DMKU-CP282, DMKU-CP469                                                                                                                               | 2             |
| <i>Hannella oryzae</i>                                 | DMKU-CP177, DMKU-CP174, YE-69                                                                                                                        | 3             |
| <i>Hannella sinensis</i>                               | DMKU-CP181, DMKU-CP184, DMKU-CP188,<br>DMKU-CP294, DMKU-CP299, DMKU-CP335,<br>DMKU-CP321, DMKU-CP386, DMKU-CP430,<br>DMKU-CP437, YE-19, YE-56, YE-58 | 13            |
| <i>Hannella siamensis</i>                              | DMKU-CP200, DMKU-CP09, YE-124                                                                                                                        | 3             |
| <i>Papiliotrema aspenensis</i>                         | YE-105                                                                                                                                               | 1             |
| <i>Papiliotrema flavescens</i>                         | YE-127                                                                                                                                               | 1             |
| <i>Papiliotrema hoabinhensis</i>                       | DMKU-CP97                                                                                                                                            | 1             |
| <i>Papiliotrema japonica</i>                           | YE-135                                                                                                                                               | 1             |
| <i>Papiliotrema laurentii</i>                          | DMKU-CP250, YE-23                                                                                                                                    | 2             |
| <i>Papiliotrema nemorosus</i>                          | DMKU-CP380, DMKU-CP391                                                                                                                               | 2             |
| <i>Papiliotrema rajasthanensis</i>                     | DMKU-CP395, DMKU-CP02, DMKU-CP10,<br>DMKU-CP204, DMKU-CP213, DMKU-CP348<br>DMKU-CP502, DMKU-RP222, YE-253                                            | 9             |
| <i>Papiliotrema siamense</i>                           | YE-43                                                                                                                                                | 1             |

| Taxa                                                      | Strain                                                                                                                                                            | No. of strain |
|-----------------------------------------------------------|-------------------------------------------------------------------------------------------------------------------------------------------------------------------|---------------|
| <i>Saitozyma flava</i>                                    | DMKU-CP150                                                                                                                                                        | 1             |
| <i>Trichosporon asahii</i>                                | YE-116                                                                                                                                                            | 1             |
| <i>Trichosporon asteroides</i>                            | YE-169                                                                                                                                                            | 1             |
| <b>Phylum Basidiomycota, Subphylum Pucciniomycotina</b>   |                                                                                                                                                                   |               |
| <i>Occultifer exturnus</i>                                | DMKU-CP332                                                                                                                                                        | 1             |
| <i>Rhodosporiobolus fluvialis</i>                         | DMKU-CP34, DMKU-CP293                                                                                                                                             | 2             |
| <i>Rhodosporiobolus ruineniae</i>                         | DMKU-CP270, DMKU-CP284, DMKU-CP353, DMKU-CP355                                                                                                                    | 4             |
| <i>Rhodotorula mucilaginosa</i>                           | DMKU-CP165, YE-102, YE-112, YE-171, YE-175                                                                                                                        | 5             |
| <i>Rhodotorula paludigena</i>                             | DMKU-CP168, DMKU-CP234, DMKU-CP256, DMKU-CP259, DMKU-CP493, DMKU-CP119, DMKU-CP162, DMKU-CP170, DMKU-CP179, DMKU-CP203, DMKU-CP218, DMKU-CP411, DMKU-CP460, YE-52 | 14            |
| <i>Rhodotorula slooffiae</i>                              | DMKU-CP485, DMKU-CP135,                                                                                                                                           | 2             |
| <i>Rhodotorula</i> sp.                                    | DMKU-CP209, DMKU-CP246, DMKU-CP297, YE-188                                                                                                                        | 4             |
| <i>Rhodotorula taiwanensis</i>                            | DMKU-CP04, DMKU-CP18, DMKU-CP55, YE-126, YE-213, YE-9                                                                                                             | 6             |
| <i>Rhodotorula toruloides</i>                             | DMKU-CP474                                                                                                                                                        | 1             |
| <i>Sporidiobolus pararoseus</i>                           | DMKU-CP195, DMKU-CP183, DMKU-CP186, DMKU-CP305, DMKU-CP322, DMKU-CP403, DMKU-CP418, DMKU-CP505, DMKU-CP513, YE-17, YE-249, YE-60                                  | 12            |
| <i>Sporobolomyces bannaensis</i>                          | DMKU-CP24                                                                                                                                                         | 1             |
| <i>Sporobolomyces blumeae</i>                             | YE-144, YE-15                                                                                                                                                     | 2             |
| <i>Sporobolomyces nylandii</i>                            | DMKU-CP133, DMKU-CP217, DMKU-CP230                                                                                                                                | 3             |
| <i>Sporobolomyces carnicolor</i>                          | DMKU-CP29, DMKU-CP477, DMKU-CP489                                                                                                                                 | 3             |
| <i>Sporobolomyces</i> sp.                                 | YE-81                                                                                                                                                             | 1             |
| <i>Symmetrospora marina</i>                               | DMKU-CP155, DMKU-CP149                                                                                                                                            | 2             |
| <i>Symmetrospora oryzicola</i>                            | DMKU-CP457                                                                                                                                                        | 1             |
| <i>Symmetrospora suhii</i>                                | DMKU-CP145, DMKU-CP443                                                                                                                                            | 2             |
| <b>Phylum Basidiomycota, Subphylum Ustilaginomycotina</b> |                                                                                                                                                                   |               |
| <i>Dirkmeia churashimeansis</i>                           | YE-223, YE-71                                                                                                                                                     | 2             |
| <i>Moesziomyces aphidis</i>                               | DMKU-CP111, DMKU-CP220                                                                                                                                            | 2             |
| <i>Moesziomyces antarcticus</i>                           | DMKU-CP124, YE-142                                                                                                                                                | 2             |
| <i>Pseudozyma hubeiensis</i>                              | YE-21                                                                                                                                                             | 1             |
